# Supplementary material
Source: PubMed Central journal article supplement (PMC6314138)
Supplement: supp_RA118.003784_137879_2_supp_223206_ph099d.pdf [file supp_RA118.003784_137879_2_supp_223206_ph099d.pdf]

The C-terminus of *Pseudomonas aeruginosa* ExoY effector is crucial for binding to its eukaryotic activator, F-actin

Alexander Belyy<sup>1\*</sup>, Ignacio Santecchia<sup>2</sup>, Louis Renault<sup>3</sup>, Blandine Bourigault<sup>3</sup>, Daniel Ladant<sup>1</sup> & Undine Mechold<sup>1\*</sup>

**Supporting Information:**

**Figure S1.** Alignment of ExoY Phyre 2 model (yellow) with ExoY PDB 5XNW (red) performed by PyMol.

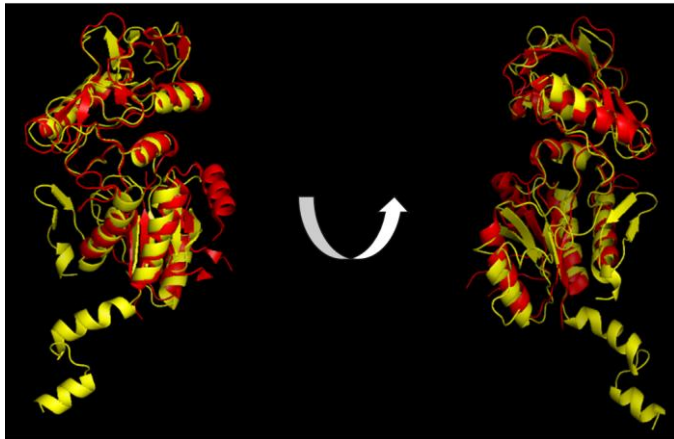

## Supplementary material and methods

### Plasmid preparation

p1653, pB158, pB159, pB160 and p1652 for the expression of WT ExoY and the ExoY variants with C-terminal deletions of 3, 5, 7 and 9 amino acids respectively, in *S. cerevisiae* model, were constructed as follows: Primers #1259 and #1284, #b223 and #b224, #b223 and #b225, #b223 and #b226 or #1259 and #1283 were used to PCR-amplify the according fragments from p1593. The XhoI, NheI digested fragments were cloned into YEpGal555.

p1665, p1666, p1667, p1668, p1669, p1670, p1671, pB187, pB188, pB189, pB216, pB217, pB218, pB219, pB220, pB221, pB222 and pB223 for the expression of ExoY variants with single or double mutations in *S. cerevisiae* (for detailed plasmid description provided in table S1), were constructed as follows: Primers #1259 and #1298, #1259 and #1299, #1259 and #1300, #1259 and #1301, #1259 and #1302, #1259 and #1303, #1259 and #1304, #b223 and #b260, #b223 and #b261, #b223 and #b262, #b223 and #b311, #b223 and #b312, #b223 and #b313, #b223 and #b314, #b223 and #b315, #b223 and #b316, #b223 and #b317, or #b223 and #b318 were used to PCR-amplify the according fragments from p1653. The XhoI, NheI digested fragments were cloned into YEpGal555.

p1664 for the expression of ExoY variant L371A in *S. cerevisiae*, was constructed by two-step overlap PCR, using primers #1259, #1284, #1305 and #1306. The XhoI, NheI digested fragment was cloned into YEpGal555.

pB193, pB194 and pB195 for the expression of ExoY variants with N-terminal deletions of 10, 20 and 30 amino acids respectively in *S. cerevisiae* model, were constructed as follows: Primers #b266 and #b78, #b267 and #b78, or #b268 and #b78 were used to PCR-amplify the according fragments from p1653. The XhoI, NheI digested fragments were cloned into YEpGal555.

pB198 for the expression of ExoY variant from *P. aeruginosa* UCBPP PA14 strain in *S. cerevisiae* model was constructed as follows: Primers #b273 and #b274 were used to PCR-amplify the according fragments from genomic DNA of the strain. The XhoI, KpnI digested fragments were cloned into YEpGal555.

pB233 and pB234 for the expression of GFP and GFP-ExoY<sub>K81M</sub> in *S. cerevisiae* model were prepared as follows: Primers #b327 and #b328 were used to PCR-amplify the GFP gene from pEFGP-C1 plasmid. The XhoI digested fragment was cloned into YEpGal555 or into p1594, respectively.

pB247 for the expression of GFP-ExoY<sub>K81M</sub> with C-terminal deletion of 9 amino acids in *S. cerevisiae* model, was prepared as follows: The BamHI digested fragment from the plasmid pB234 was inserted into p1652.

pB240 and pB256 for expression of ExoY variants with C-terminal deletion of 5 or 9 amino acids, respectively, in *E. coli*, were prepared as follows: Primers #b167 and #b336 and #b167 and #b350 were used to PCR-amplify the according fragments from pUM460. The NdeI, KpnI digested fragments were cloned into pUM460.

pB241 for expression of ExoY variant from *P. aeruginosa* UCBPP PA14 strain in *E. coli* was constructed in two steps: 1) The NcoI/KpnI digested fragment from pB198 was cloned into pUM460. 2) Primers #b78 and #b340 were used to PCR-amplify the C-terminus of the toxin variant from pB198. The NcoI digested PCR-fragment were cloned into the intermediate construction from step 1.

pB243 and pB244 for expression of ExoY variant with single mutations F367A or L371G, respectively, in *E. coli* were constructed as follows: Primers #b3 and #b334 were used to amplify fragments from pB218 and pB222. The NdeI, KpnI digested fragments were cloned into pUM460.

pB255 for expression of ExoY variant from UCBPP PA14 strain with C-terminus from WT ExoY in *E. coli* was constructed as follows: Primers #b167 and #b349 were used to amplify the fragment from pB241. The NdeI, KpnI digested fragment was cloned into pB241.

pB137 for the expression of 6XHis-tagged maltose-binding protein in *E. coli* was constructed as follows: Primers #b190 and #b191 were used to PCR-amplify the fragment from pMAL-c5X. The NdeI, HindIII digested fragment was cloned into pET28a.

pB138, pB141, pB142, pB152, pB153, pB154, pB155 and pB156 for expression of complete ExoY or ExoY fragments in the fusion with maltose-binding protein in *E. coli* were constructed as follows: Primers #b192 and #b193, #b196 and #b193, #b197 and #b193, #b212 and #b213, #b214 and #b215, #b216 and #b217, #b218 and #b219, or #b220 and #b221 were used to PCR-amplify the ExoY fragment from pUM460. The SacI, HindIII digested fragments were cloned into pB137.

pB182, pB183 and pB184 for expression of cysteine-containing ExoY fragments in the fusion with maltose-binding protein in *E. coli* were constructed as follows: Primers #b197 and #b255, #b197 and #b256, #b197 and #b257 were used to PCR-amplify the fragments from pB142. The SacI, HindIII digested fragments were cloned into pB137.

**Table S1.** List of *P. aeruginosa* strains encoding PA14-like ExoY variant.

| <b>Genome</b>                                        | <b>Genome ID</b> | <b>PATRIC ID</b>       | <b>Length (AA)</b> | <b>Identity</b> | <b>ExoU</b> |
|------------------------------------------------------|------------------|------------------------|--------------------|-----------------|-------------|
| <b><i>Pseudomonas aeruginosa</i> ATCC 700888</b>     | 1163394.3        | fig 1163394.3.peg.2931 | 410                | 98              | yes         |
| <b><i>Pseudomonas aeruginosa</i> strain TSB 1</b>    | 287.1875         | fig 287.1875.peg.3561  | 414                | 100             | yes         |
| <b><i>Pseudomonas aeruginosa</i> strain RW27</b>     | 287.1876         | fig 287.1876.peg.4169  | 414                | 100             | yes         |
| <b><i>Pseudomonas aeruginosa</i> strain TSB 3</b>    | 287.1879         | fig 287.1879.peg.5195  | 414                | 100             | yes         |
| <b><i>Pseudomonas aeruginosa</i> strain 10% 1</b>    | 287.1881         | fig 287.1881.peg.4280  | 414                | 100             | yes         |
| <b><i>Pseudomonas aeruginosa</i> strain 10% 9</b>    | 287.1882         | fig 287.1882.peg.4912  | 414                | 100             | yes         |
| <b><i>Pseudomonas aeruginosa</i> strain 12.5% 6</b>  | 287.1883         | fig 287.1883.peg.3981  | 414                | 100             | yes         |
| <b><i>Pseudomonas aeruginosa</i> strain 15% 5</b>    | 287.1884         | fig 287.1884.peg.5273  | 414                | 100             | yes         |
| <b><i>Pseudomonas aeruginosa</i> strain 15.121c</b>  | 287.1885         | fig 287.1885.peg.3060  | 414                | 100             | yes         |
| <b><i>Pseudomonas aeruginosa</i> strain 15.311Ga</b> | 287.1886         | fig 287.1886.peg.2496  | 414                | 100             | yes         |
| <b><i>Pseudomonas aeruginosa</i> strain TSB Pool</b> | 287.1887         | fig 287.1887.peg.5600  | 414                | 100             | yes         |
| <b><i>Pseudomonas aeruginosa</i> strain RW30</b>     | 287.1888         | fig 287.1888.peg.4589  | 414                | 100             | yes         |
| <b><i>Pseudomonas aeruginosa</i> strain TSB 4</b>    | 287.1892         | fig 287.1892.peg.3452  | 414                | 100             | yes         |
| <b><i>Pseudomonas aeruginosa</i> strain 10% 2</b>    | 287.1893         | fig 287.1893.peg.4854  | 414                | 100             | yes         |
| <b><i>Pseudomonas aeruginosa</i> strain 15.211Ga</b> | 287.1894         | fig 287.1894.peg.4618  | 414                | 100             | yes         |
| <b><i>Pseudomonas aeruginosa</i> strain TSB 9</b>    | 287.1918         | fig 287.1918.peg.2590  | 414                | 100             | yes         |
| <b><i>Pseudomonas aeruginosa</i> strain 10% 7</b>    | 287.1920         | fig 287.1920.peg.1982  | 414                | 100             | yes         |
| <b><i>Pseudomonas aeruginosa</i> strain 12.5% 4</b>  | 287.1921         | fig 287.1921.peg.4712  | 414                | 100             | yes         |
| <b><i>Pseudomonas aeruginosa</i> strain 15% 3</b>    | 287.1922         | fig 287.1922.peg.751   | 414                | 100             | yes         |
| <b><i>Pseudomonas aeruginosa</i> strain 15.121a</b>  | 287.1923         | fig 287.1923.peg.4455  | 414                | 100             | yes         |
| <b><i>Pseudomonas aeruginosa</i> strain 15.221Ga</b> | 287.1924         | fig 287.1924.peg.4729  | 414                | 100             | yes         |
| <b><i>Pseudomonas aeruginosa</i> strain RW18</b>     | 287.1926         | fig 287.1926.peg.3924  | 414                | 100             | yes         |
| <b><i>Pseudomonas aeruginosa</i> strain RW192</b>    | 287.1928         | fig 287.1928.peg.3505  | 414                | 100             | yes         |
| <b><i>Pseudomonas aeruginosa</i> strain TSB 2</b>    | 287.1929         | fig 287.1929.peg.348   | 414                | 100             | yes         |
| <b><i>Pseudomonas aeruginosa</i> strain 10% 8</b>    | 287.1932         | fig 287.1932.peg.4382  | 414                | 100             | yes         |

|                                                      |          |                       |     |     |     |
|------------------------------------------------------|----------|-----------------------|-----|-----|-----|
| <b>Pseudomonas aeruginosa strain 12.5% 5</b>         | 287.1933 | fig 287.1933.peg.5202 | 414 | 100 | yes |
| <b>Pseudomonas aeruginosa strain 15% 4</b>           | 287.1934 | fig 287.1934.peg.4729 | 414 | 100 | yes |
| <b>Pseudomonas aeruginosa strain 15.121b</b>         | 287.1935 | fig 287.1935.peg.5025 | 414 | 100 | yes |
| <b>Pseudomonas aeruginosa strain 15.221Ba</b>        | 287.1936 | fig 287.1936.peg.3201 | 414 | 100 | yes |
| <b>Pseudomonas aeruginosa strain 12.5% 1.1</b>       | 287.1938 | fig 287.1938.peg.4543 | 414 | 100 | yes |
| <b>Pseudomonas aeruginosa strain 12.5% 7</b>         | 287.1939 | fig 287.1939.peg.1213 | 414 | 100 | yes |
| <b>Pseudomonas aeruginosa strain 15% 6</b>           | 287.1940 | fig 287.1940.peg.501  | 414 | 100 | yes |
| <b>Pseudomonas aeruginosa strain TSB Bead Pool 1</b> | 287.1941 | fig 287.1941.peg.3114 | 414 | 100 | yes |
| <b>Pseudomonas aeruginosa strain RW99</b>            | 287.1943 | fig 287.1943.peg.4558 | 414 | 100 | yes |
| <b>Pseudomonas aeruginosa strain RW199</b>           | 287.1944 | fig 287.1944.peg.1423 | 414 | 100 | yes |
| <b>Pseudomonas aeruginosa strain TSB 5</b>           | 287.1945 | fig 287.1945.peg.4422 | 414 | 100 | yes |
| <b>Pseudomonas aeruginosa strain 10% 3</b>           | 287.1947 | fig 287.1947.peg.286  | 414 | 100 | yes |
| <b>Pseudomonas aeruginosa strain 12.5% 1.2</b>       | 287.1948 | fig 287.1948.peg.5965 | 414 | 100 | yes |
| <b>Pseudomonas aeruginosa strain 12.5% 8</b>         | 287.1949 | fig 287.1949.peg.3737 | 414 | 100 | yes |
| <b>Pseudomonas aeruginosa strain 15.211 Gb</b>       | 287.1951 | fig 287.1951.peg.6017 | 414 | 100 | yes |
| <b>Pseudomonas aeruginosa strain 15.311Ba</b>        | 287.1952 | fig 287.1952.peg.4234 | 414 | 100 | yes |
| <b>Pseudomonas aeruginosa strain TSB Bead Pool 2</b> | 287.1953 | fig 287.1953.peg.2806 | 414 | 100 | yes |
| <b>Pseudomonas aeruginosa strain TSB 8</b>           | 287.1962 | fig 287.1962.peg.4330 | 414 | 100 | yes |
| <b>Pseudomonas aeruginosa strain 10% 6</b>           | 287.1964 | fig 287.1964.peg.3853 | 414 | 100 | yes |
| <b>Pseudomonas aeruginosa strain 12.5% 3</b>         | 287.1965 | fig 287.1965.peg.272  | 414 | 100 | yes |
| <b>Pseudomonas aeruginosa strain 15% 2</b>           | 287.1966 | fig 287.1966.peg.3237 | 414 | 100 | yes |
| <b>Pseudomonas aeruginosa strain 15.111c</b>         | 287.1967 | fig 287.1967.peg.2282 | 414 | 100 | yes |
| <b>Pseudomonas aeruginosa strain 15.211Bb</b>        | 287.1968 | fig 287.1968.peg.5183 | 414 | 100 | yes |
| <b>Pseudomonas aeruginosa strain ATCC 43731</b>      | 287.1995 | fig 287.1995.peg.4221 | 414 | 100 | yes |
| <b>Pseudomonas aeruginosa strain B10W</b>            | 287.2562 | fig 287.2562.peg.263  | 414 | 100 | yes |
| <b>Pseudomonas aeruginosa strain PA14Or_reads</b>    | 287.2971 | fig 287.2971.peg.3002 | 410 | 98  | yes |
| <b>Pseudomonas aeruginosa strain PA14Or_reads</b>    | 287.2981 | fig 287.2981.peg.3047 | 414 | 100 | yes |

|                                                  |          |                       |     |     |     |
|--------------------------------------------------|----------|-----------------------|-----|-----|-----|
| <b>Pseudomonas aeruginosa strain 560747</b>      | 287.3108 | fig 287.3108.peg.5175 | 410 | 98  | yes |
| <b>Pseudomonas aeruginosa strain CCF_839</b>     | 287.3111 | fig 287.3111.peg.5553 | 414 | 100 | yes |
| <b>Pseudomonas aeruginosa strain CL232</b>       | 287.3115 | fig 287.3115.peg.5013 | 414 | 100 | yes |
| <b>Pseudomonas aeruginosa strain CLB24226</b>    | 287.3128 | fig 287.3128.peg.1748 | 410 | 98  | yes |
| <b>Pseudomonas aeruginosa strain 0511A_66_19</b> | 287.3131 | fig 287.3131.peg.4963 | 414 | 100 | yes |
| <b>Pseudomonas aeruginosa strain 149</b>         | 287.3262 | fig 287.3262.peg.6288 | 414 | 100 | yes |
| <b>Pseudomonas aeruginosa strain 150</b>         | 287.3263 | fig 287.3263.peg.144  | 414 | 100 | yes |
| <b>Pseudomonas aeruginosa strain 151</b>         | 287.3264 | fig 287.3264.peg.82   | 414 | 100 | yes |
| <b>Pseudomonas aeruginosa strain 155</b>         | 287.3265 | fig 287.3265.peg.886  | 414 | 100 | yes |
| <b>Pseudomonas aeruginosa strain 152</b>         | 287.3266 | fig 287.3266.peg.2637 | 414 | 100 | yes |
| <b>Pseudomonas aeruginosa strain 153</b>         | 287.3267 | fig 287.3267.peg.4232 | 414 | 100 | yes |
| <b>Pseudomonas aeruginosa strain 154</b>         | 287.3268 | fig 287.3268.peg.4513 | 414 | 100 | yes |
| <b>Pseudomonas aeruginosa strain 156</b>         | 287.3269 | fig 287.3269.peg.2338 | 414 | 100 | yes |
| <b>Pseudomonas aeruginosa strain 157</b>         | 287.3270 | fig 287.3270.peg.4242 | 414 | 100 | yes |
| <b>Pseudomonas aeruginosa strain 158</b>         | 287.3271 | fig 287.3271.peg.1153 | 414 | 100 | yes |
| <b>Pseudomonas aeruginosa strain 159</b>         | 287.3272 | fig 287.3272.peg.139  | 414 | 100 | yes |
| <b>Pseudomonas aeruginosa strain 160</b>         | 287.3273 | fig 287.3273.peg.5568 | 414 | 100 | yes |
| <b>Pseudomonas aeruginosa strain 161</b>         | 287.3274 | fig 287.3274.peg.5815 | 414 | 100 | yes |
| <b>Pseudomonas aeruginosa strain 162</b>         | 287.3275 | fig 287.3275.peg.324  | 414 | 100 | yes |
| <b>Pseudomonas aeruginosa strain 163</b>         | 287.3276 | fig 287.3276.peg.6293 | 414 | 100 | yes |
| <b>Pseudomonas aeruginosa strain 164</b>         | 287.3277 | fig 287.3277.peg.592  | 414 | 100 | yes |
| <b>Pseudomonas aeruginosa strain 167</b>         | 287.3279 | fig 287.3279.peg.558  | 414 | 100 | yes |
| <b>Pseudomonas aeruginosa strain 168</b>         | 287.3281 | fig 287.3281.peg.6276 | 414 | 100 | yes |
| <b>Pseudomonas aeruginosa strain 169</b>         | 287.3282 | fig 287.3282.peg.2524 | 414 | 100 | yes |
| <b>Pseudomonas aeruginosa strain 171</b>         | 287.3283 | fig 287.3283.peg.152  | 414 | 100 | yes |
| <b>Pseudomonas aeruginosa strain 170</b>         | 287.3284 | fig 287.3284.peg.1647 | 414 | 100 | yes |
| <b>Pseudomonas aeruginosa strain 172</b>         | 287.3285 | fig 287.3285.peg.30   | 414 | 100 | yes |

|                                                 |          |                       |     |     |     |
|-------------------------------------------------|----------|-----------------------|-----|-----|-----|
| <b>Pseudomonas aeruginosa strain 177</b>        | 287.3291 | fig 287.3291.peg.4954 | 414 | 100 | yes |
| <b>Pseudomonas aeruginosa strain 338</b>        | 287.3438 | fig 287.3438.peg.2904 | 414 | 100 | yes |
| <b>Pseudomonas aeruginosa strain 342</b>        | 287.3442 | fig 287.3442.peg.743  | 414 | 100 | yes |
| <b>Pseudomonas aeruginosa strain 343</b>        | 287.3443 | fig 287.3443.peg.5123 | 414 | 100 | yes |
| <b>Pseudomonas aeruginosa strain 344</b>        | 287.3444 | fig 287.3444.peg.2990 | 414 | 100 | yes |
| <b>Pseudomonas aeruginosa strain 345</b>        | 287.3445 | fig 287.3445.peg.220  | 414 | 100 | yes |
| <b>Pseudomonas aeruginosa strain 346</b>        | 287.3446 | fig 287.3446.peg.33   | 414 | 100 | yes |
| <b>Pseudomonas aeruginosa strain 347</b>        | 287.3447 | fig 287.3447.peg.865  | 414 | 100 | yes |
| <b>Pseudomonas aeruginosa strain 348</b>        | 287.3448 | fig 287.3448.peg.564  | 414 | 100 | yes |
| <b>Pseudomonas aeruginosa strain 405</b>        | 287.3503 | fig 287.3503.peg.3574 | 414 | 100 | yes |
| <b>Pseudomonas aeruginosa strain 406</b>        | 287.3504 | fig 287.3504.peg.3883 | 414 | 100 | yes |
| <b>Pseudomonas aeruginosa strain 415</b>        | 287.3513 | fig 287.3513.peg.5514 | 414 | 100 | yes |
| <b>Pseudomonas aeruginosa strain 416</b>        | 287.3514 | fig 287.3514.peg.364  | 414 | 100 | yes |
| <b>Pseudomonas aeruginosa strain 417</b>        | 287.3515 | fig 287.3515.peg.6005 | 414 | 100 | yes |
| <b>Pseudomonas aeruginosa strain 149.1</b>      | 287.3548 | fig 287.3548.peg.3790 | 414 | 100 | yes |
| <b>Pseudomonas aeruginosa strain 161.1</b>      | 287.3550 | fig 287.3550.peg.5959 | 414 | 100 | yes |
| <b>Pseudomonas aeruginosa strain 163.1</b>      | 287.3551 | fig 287.3551.peg.2700 | 414 | 100 | yes |
| <b>Pseudomonas aeruginosa strain COPD2a</b>     | 287.3736 | fig 287.3736.peg.1825 | 414 | 100 | yes |
| <b>Pseudomonas aeruginosa strain PASGNDM345</b> | 287.3877 | fig 287.3877.peg.3379 | 410 | 98  | yes |
| <b>Pseudomonas aeruginosa strain PASGNDM699</b> | 287.3878 | fig 287.3878.peg.3378 | 410 | 98  | yes |
| <b>Pseudomonas aeruginosa strain PASGNDM571</b> | 287.3884 | fig 287.3884.peg.3191 | 410 | 98  | yes |
| <b>Pseudomonas aeruginosa strain PASGNDM583</b> | 287.3885 | fig 287.3885.peg.5453 | 410 | 98  | yes |
| <b>Pseudomonas aeruginosa strain PASGNDM544</b> | 287.3886 | fig 287.3886.peg.5251 | 410 | 98  | yes |
| <b>Pseudomonas aeruginosa strain PASGNDM587</b> | 287.3887 | fig 287.3887.peg.1646 | 410 | 98  | yes |
| <b>Pseudomonas aeruginosa strain PASGNDM592</b> | 287.3888 | fig 287.3888.peg.5154 | 410 | 98  | yes |
| <b>Pseudomonas aeruginosa strain PASGNDM586</b> | 287.3889 | fig 287.3889.peg.2848 | 410 | 98  | yes |
| <b>Pseudomonas aeruginosa strain PASGNDM591</b> | 287.3890 | fig 287.3890.peg.229  | 410 | 98  | yes |

|                                                 |           |                            |     |     |     |
|-------------------------------------------------|-----------|----------------------------|-----|-----|-----|
| <b>Pseudomonas aeruginosa strain PASGNDM590</b> | 287.3891  | fig 287.3891.peg.6565      | 410 | 98  | yes |
| <b>Pseudomonas aeruginosa strain PASGNDM593</b> | 287.3892  | fig 287.3892.peg.6239      | 410 | 98  | yes |
| <b>Pseudomonas aeruginosa strain W1j</b>        | 287.4346  | fig 287.4346.peg.3848      | 414 | 100 | yes |
| <b>Pseudomonas aeruginosa strain U1o-2</b>      | 287.4351  | fig 287.4351.peg.5249      | 414 | 100 | yes |
| <b>Pseudomonas aeruginosa strain U1i</b>        | 287.4352  | fig 287.4352.peg.119       | 414 | 100 | yes |
| <b>Pseudomonas aeruginosa strain U1j-3</b>      | 287.4357  | fig 287.4357.peg.524       | 410 | 98  | yes |
| <b>Pseudomonas aeruginosa strain env065a</b>    | 287.4422  | fig 287.4422.peg.614       | 410 | 98  | yes |
| <b>Pseudomonas aeruginosa strain env408</b>     | 287.4426  | fig 287.4426.peg.6260      | 414 | 100 | yes |
| <b>Pseudomonas aeruginosa strain env187</b>     | 287.4449  | fig 287.4449.peg.764       | 414 | 100 | yes |
| <b>Pseudomonas aeruginosa strain env113b</b>    | 287.4453  | fig 287.4453.peg.298       | 410 | 98  | yes |
| <b>Pseudomonas aeruginosa strain L10</b>        | 287.4463  | fig 287.4463.peg.3228      | 414 | 100 | yes |
| <b>Pseudomonas aeruginosa strain N002</b>       | 1194669.3 | fig 1194669.3.peg.129<br>5 | 414 | 100 | yes |



**Table S2.** List of primers, strains and plasmids used in this study.

## A. Strains and plasmids

|                                    | Description                                                                                                                                                                                        | Reference  |
|------------------------------------|----------------------------------------------------------------------------------------------------------------------------------------------------------------------------------------------------|------------|
| <b>Bacteria and yeast strains</b>  |                                                                                                                                                                                                    |            |
| <i>E. coli</i> DH5a                | F <sup>-</sup> Φ80 <i>lacZ</i> ΔM15 Δ( <i>lacZYA-argF</i> ) U169 <i>recA1 endA1 hsdR17</i> (r <sub>k</sub> <sup>-</sup> , m <sub>k</sub> <sup>+</sup> )<br><i>phoA supE44 thi-1 gyrA96 relA1 λ</i> | Invitrogen |
| <i>E. coli</i> BLR                 | <i>recA</i> <sup>-</sup> : F <sup>-</sup> <i>ompT hsdS<sub>B</sub></i> (r <sub>B</sub> <sup>-</sup> m <sub>B</sub> <sup>-</sup> ) <i>gal dcm</i> Δ( <i>srl-recA</i> )306::Tn10 (Tet <sup>R</sup> ) | Novagen    |
| <i>E. coli</i> BL21 DE3            | F <sup>-</sup> <i>ompT hsdS<sub>B</sub></i> (r <sub>B</sub> <sup>-</sup> m <sub>B</sub> <sup>-</sup> ) <i>gal dcm</i> (DE3)                                                                        | Novagen    |
| <i>P. aeruginosa</i><br>UCBPP-PA14 | A strain from international reference panel of <i>P. aeruginosa</i> isolates                                                                                                                       | (1)        |
| <i>S. cerevisiae</i><br>MH272-3fa  | “Wild-type” strain, <i>ura3, leu2, his3, trp1, ade2</i>                                                                                                                                            | (2)        |
| <i>S. cerevisiae</i> SC489         | <i>S. cerevisiae</i> MH272-3fa <i>act1</i> ::LEU2 + <i>ACT1</i> [His3]                                                                                                                             | (3)        |
| <i>S. cerevisiae</i> SC691         | <i>S. cerevisiae</i> MH272-3fa <i>act1</i> ::LEU2 + <i>ACT1</i> D25N[His3]                                                                                                                         | (3)        |
| <i>S. cerevisiae</i> Y70           | <i>S. cerevisiae</i> MH272-3fa + Vector[Ade2] (YEpGal555)                                                                                                                                          | (4)        |
| <i>S. cerevisiae</i> Y213          | <i>S. cerevisiae</i> MH272-3fa + ExoY C-9 deletion[Ade2] (p1652)                                                                                                                                   | This study |
| <i>S. cerevisiae</i> Y214          | <i>S. cerevisiae</i> MH272-3fa + ExoY[Ade2] (p1653)                                                                                                                                                | (4)        |
| <i>S. cerevisiae</i> Y215          | <i>S. cerevisiae</i> MH272-3fa + ExoY C-3 deletion[Ade2] (p158)                                                                                                                                    | This study |
| <i>S. cerevisiae</i> Y216          | <i>S. cerevisiae</i> MH272-3fa + ExoY C-5 deletion[Ade2] (p159)                                                                                                                                    | This study |
| <i>S. cerevisiae</i> Y217          | <i>S. cerevisiae</i> MH272-3fa + ExoY C-7 deletion[Ade2] (p160)                                                                                                                                    | This study |
| <i>S. cerevisiae</i> Y235          | <i>S. cerevisiae</i> MH272-3fa + ExoY N-10 deletion[Ade2] (pB193)                                                                                                                                  | This study |
| <i>S. cerevisiae</i> Y236          | <i>S. cerevisiae</i> MH272-3fa + ExoY N-20 deletion[Ade2] (pB194)                                                                                                                                  | This study |
| <i>S. cerevisiae</i> Y237          | <i>S. cerevisiae</i> MH272-3fa + ExoY N-30 deletion[Ade2] (pB195)                                                                                                                                  | This study |
| <i>S. cerevisiae</i> Y252          | <i>S. cerevisiae</i> MH272-3fa + ExoY L371A[Ade2] (p1664)                                                                                                                                          | This study |
| <i>S. cerevisiae</i> Y253          | <i>S. cerevisiae</i> MH272-3fa + ExoY D372[Ade2] (p1665)                                                                                                                                           | This study |
| <i>S. cerevisiae</i> Y254          | <i>S. cerevisiae</i> MH272-3fa + ExoY F373A[Ade2] (p1666)                                                                                                                                          | This study |
| <i>S. cerevisiae</i> Y255          | <i>S. cerevisiae</i> MH272-3fa + ExoY F374A[Ade2] (p1667)                                                                                                                                          | This study |
| <i>S. cerevisiae</i> Y256          | <i>S. cerevisiae</i> MH272-3fa + ExoY Q375A[Ade2] (p1668)                                                                                                                                          | This study |
| <i>S. cerevisiae</i> Y257          | <i>S. cerevisiae</i> MH272-3fa + ExoY R376A[Ade2] (p1669)                                                                                                                                          | This study |
| <i>S. cerevisiae</i> Y258          | <i>S. cerevisiae</i> MH272-3fa + ExoY K377A[Ade2] (p1670)                                                                                                                                          | This study |
| <i>S. cerevisiae</i> Y259          | <i>S. cerevisiae</i> MH272-3fa + ExoY V378A[Ade2] (p1671)                                                                                                                                          | This study |
| <i>S. cerevisiae</i> Y260          | <i>S. cerevisiae</i> MH272-3fa + ExoY L371A/D372A[Ade2] (pB187)                                                                                                                                    | This study |
| <i>S. cerevisiae</i> Y261          | <i>S. cerevisiae</i> MH272-3fa + ExoY D372A/F373A[Ade2] (pB188)                                                                                                                                    | This study |
| <i>S. cerevisiae</i> Y262          | <i>S. cerevisiae</i> MH272-3fa + ExoY F373A/F374A[Ade2] (pB189)                                                                                                                                    | This study |
| <i>S. cerevisiae</i> Y263          | <i>S. cerevisiae</i> MH272-3fa + ExoY UCBPP-PA14 [Ade2] (pB198)                                                                                                                                    | This study |
| <i>S. cerevisiae</i> Y276          | <i>S. cerevisiae</i> MH272-3fa + ExoY E369A[Ade2] (pB216)                                                                                                                                          | This study |
| <i>S. cerevisiae</i> Y277          | <i>S. cerevisiae</i> MH272-3fa + ExoY Q368A[Ade2] (pB217)                                                                                                                                          | This study |
| <i>S. cerevisiae</i> Y278          | <i>S. cerevisiae</i> MH272-3fa + ExoY F367A[Ade2] (pB218)                                                                                                                                          | This study |
| <i>S. cerevisiae</i> Y279          | <i>S. cerevisiae</i> MH272-3fa + ExoY S366A[Ade2] (pB219)                                                                                                                                          | This study |
| <i>S. cerevisiae</i> Y280          | <i>S. cerevisiae</i> MH272-3fa + ExoY E369G[Ade2] (pB220)                                                                                                                                          | This study |
| <i>S. cerevisiae</i> Y281          | <i>S. cerevisiae</i> MH272-3fa + ExoY A370G[Ade2] (pB221)                                                                                                                                          | This study |
| <i>S. cerevisiae</i> Y282          | <i>S. cerevisiae</i> MH272-3fa + ExoY L371G[Ade2] (pB222)                                                                                                                                          | This study |
| <i>S. cerevisiae</i> Y283          | <i>S. cerevisiae</i> MH272-3fa + ExoY A370P[Ade2] (pB223)                                                                                                                                          | This study |
| <i>S. cerevisiae</i> Y284          | <i>S. cerevisiae</i> MH272-3fa <i>act1</i> ::LEU2 + <i>ACT1</i> [His3] + GFP[Ade2]<br>(pB233)                                                                                                      | This study |
| <i>S. cerevisiae</i> Y285          | <i>S. cerevisiae</i> MH272-3fa <i>act1</i> ::LEU2 + <i>ACT1</i> [His3] + GFP-ExoY K81M<br>[Ade2] (pB234)                                                                                           | This study |
| <i>S. cerevisiae</i> Y288          | <i>S. cerevisiae</i> MH272-3fa <i>act1</i> ::LEU2 + <i>ACT1</i> D25N[His3] + GFP-ExoY<br>K81M [Ade2] (pB234)                                                                                       | This study |
| <i>S. cerevisiae</i> Y302          | <i>S. cerevisiae</i> MH272-3fa <i>act1</i> ::LEU2 + <i>ACT1</i> [His3] + GFP-ExoY K81M                                                                                                             | This study |

| C-9 deletion[Ade2] (pB247)                              |                                                                                                    |            |
|---------------------------------------------------------|----------------------------------------------------------------------------------------------------|------------|
| <b>Plasmids for experiments in <i>S. cerevisiae</i></b> |                                                                                                    |            |
| YEpGal555                                               | <i>E. coli/S. cerevisiae</i> shuttle vector [ADE2]                                                 | (3)        |
| pEGFP-C1                                                | The plasmid was used for the PCR-amplification of the GFP gene                                     | Clontech   |
| p1593                                                   | WT ExoY in YEpGal555                                                                               | (5)        |
| p1594                                                   | ExoY K81M in YEpGal555                                                                             | (4)        |
| p1652                                                   | ExoY with C terminal deletion of 9 amino acids in YEpGal555                                        | This study |
| p1653                                                   | WT ExoY in YEpGal555                                                                               | This study |
| p1664                                                   | ExoY L371A in YEpGal555                                                                            | This study |
| p1665                                                   | ExoY D372A in YEpGal555                                                                            | This study |
| p1666                                                   | ExoY F373A in YEpGal555                                                                            | This study |
| p1667                                                   | ExoY F374A in YEpGal555                                                                            | This study |
| p1668                                                   | ExoY Q375A in YEpGal555                                                                            | This study |
| p1669                                                   | ExoY R376A in YEpGal555                                                                            | This study |
| p1670                                                   | ExoY K377A in YEpGal555                                                                            | This study |
| p1671                                                   | ExoY V378A in YEpGal555                                                                            | This study |
| pB158                                                   | ExoY with C terminal deletion of 3 amino acids in YEpGal555                                        | This study |
| pB159                                                   | ExoY with C terminal deletion of 5 amino acids in YEpGal555                                        | This study |
| pB160                                                   | ExoY with C terminal deletion of 7 amino acids in YEpGal555                                        | This study |
| pB187                                                   | ExoY L371A/D372A in YEpGal555                                                                      | This study |
| pB188                                                   | ExoY D372A/F373A in YEpGal555                                                                      | This study |
| pB189                                                   | ExoY F373A/F374A in YEpGal555                                                                      | This study |
| pB193                                                   | ExoY with N terminal deletion of 10 amino acids in YEpGal555                                       | This study |
| pB194                                                   | ExoY with N terminal deletion of 20 amino acids in YEpGal555                                       | This study |
| pB195                                                   | ExoY with N terminal deletion of 30 amino acids in YEpGal555                                       | This study |
| pB198                                                   | ExoY from <i>P. aeruginosa</i> UCBPP-PA14 in YEpGal555                                             | This study |
| pB216                                                   | ExoY E369A in YEpGal555                                                                            | This study |
| pB217                                                   | ExoY Q368A in YEpGal555                                                                            | This study |
| pB218                                                   | ExoY F367A in YEpGal555                                                                            | This study |
| pB219                                                   | ExoY S366A in YEpGal555                                                                            | This study |
| pB220                                                   | ExoY E369G in YEpGal555                                                                            | This study |
| pB221                                                   | ExoY A370G in YEpGal555                                                                            | This study |
| pB222                                                   | ExoY L371G in YEpGal555                                                                            | This study |
| pB223                                                   | ExoY A370P in YEpGal555                                                                            | This study |
| pB233                                                   | GFP in YEpGal555                                                                                   | This study |
| pB234                                                   | GFP-ExoY K81M fusion in YEpGal555                                                                  | This study |
| pB247                                                   | GFP-ExoY K81M fusion with C-terminal deletion of 9 amino acids in YEpGal555                        | This study |
| <b>Plasmids for protein expression</b>                  |                                                                                                    |            |
| pTRCAG                                                  | Expression vector controlled by the temperature sensitive cI repressor (cI857), Amp <sup>R</sup>   | (6)        |
| pUM460                                                  | WT ExoY with C-terminal Flag-6XHis tag in pTRCAG                                                   | (3)        |
| pB256                                                   | ExoY with 5 amino acids C-terminal deletion and C-terminal Flag-6XHis tag in pTRCAG                | This study |
| pB255                                                   | ExoY variant from PA14 strain with C-terminus from WT ExoY and C-terminal Flag-6XHis tag in pTRCAG | This study |
| pB240                                                   | ExoY with 9 amino acids C-terminal deletion and C-terminal Flag-6XHis tag in pTRCAG                | This study |
| pB241                                                   | ExoY variant from PA14 strain with C-terminal Flag-6XHis tag in pTRCAG                             | This study |
| pB243                                                   | ExoY F367A with C-terminal Flag-6XHis tag in pTRCAG                                                | This study |
| pB244                                                   | ExoY L371G with C-terminal Flag-6XHis tag in pTRCAG                                                | This study |
| pET28a                                                  | <i>E. coli</i> expression vector with T7-promoter, Kan <sup>R</sup>                                | Novagen    |
| pMAL-c5X                                                | The plasmid was used for the PCR-amplification of the MBP gene                                     | NEB        |

|       |                                                                        |            |
|-------|------------------------------------------------------------------------|------------|
| pB137 | 6XHis-tag, maltose binding protein and Glycine-serine linker in pET28a | This study |
| pB138 | WT ExoY in pB137                                                       | This study |
| pB141 | ExoY S340-V378 in pB137                                                | This study |
| pB142 | ExoY N360-V378 in pB137                                                | This study |
| pB152 | ExoY R2-G41 in pB137                                                   | This study |
| pB153 | ExoY A155-S194 in pB137                                                | This study |
| pB154 | ExoY E223-A261 in pB137                                                | This study |
| pB155 | ExoY G299-F339 in pB137                                                | This study |
| pB156 | ExoY V320-W359 in pB137                                                | This study |
| pB182 | ExoY N360-V378 F373C in pB137                                          | This study |
| pB183 | ExoY N360-V378 L371C in pB137                                          | This study |
| pB184 | ExoY N360-V378 +C379 in pB137                                          | This study |

## B. Primers

| Primer ID | Sequence, 5' to 3'                                           | Sense/<br>Antisense | Used for<br>construction(s): |
|-----------|--------------------------------------------------------------|---------------------|------------------------------|
| #1259     | CAGCTCGAGCGTATCGACGGTCATCG                                   | S                   | Numerous                     |
| #1283     | AAAGTCGCTAGCCTCCTGGAAGCTG                                    | A                   | p1653                        |
| #1284     | GGTACCGCTAGCGACCTTACGTTGAAAA                                 | A                   | p1652, p1664                 |
| #1298     | ATCTTAGCTAGCGACCTTACGTTGGAAAAAGGCGA                          | A                   | p1665                        |
| #1299     | ATCTTAGCTAGCGACCTTACGTTGGAAAGCGTGG                           | A                   | p1666                        |
| #1300     | ATCTTAGCTAGCGACCTTACGTTGGGCAAAG                              | A                   | p1667                        |
| #1301     | ATCTTAGCTAGCGACCTTACGTGCGAAA                                 | A                   | p1668                        |
| #1302     | ATCTTAGCTAGCGACCTTAGCTTGG                                    | A                   | p1669                        |
| #1303     | ATCTTAGCTAGCGACCGCACGTTG                                     | A                   | p1670                        |
| #1304     | ATCTTAGCTAGCGGCCCTTACGT                                      | A                   | p1671                        |
| #1305     | CCAGGAGGCGGCCGACTTTTTCC                                      | S                   | p1664                        |
| #1306     | GGAAAAAGTCGGCCGCTCCTGG                                       | A                   | p1664                        |
| #b3       | CAGCGAAGCGATGATTTTTG                                         | S                   | Numerous                     |
| #b78      | CAGGTTGTCTAACTCCTTCC                                         | S                   | Numerous                     |
| #b167     | CCAAGACAGCTAAAGATCCTAGA                                      | S                   | Numerous                     |
| #b223     | GACCTCGAGCGTATCGACG                                          | S                   | Numerous                     |
| #b224     | TATATAGCTAGCTTGGAAAAAGTCGAGCGC                               | A                   | pB158                        |
| #b225     | TATATAGCTAGCAAAGTCGAGCGCCTCCTG                               | A                   | pB159                        |
| #b226     | TATATAGCTAGCGAGCGCCTCCTGGAAGC                                | A                   | pB160                        |
| #b260     | TCTTAGCTAGCGACCTTACGTTGGAAAAAGGCGGCCGC                       | A                   | pB187                        |
| #b261     | TCTTAGCTAGCGACCTTACGTTGGAAAGCGGCGAG                          | A                   | pB188                        |
| #b262     | TCTTAGCTAGCGACCTTACGTTGGGCAGCGTC                             | A                   | pB189                        |
| #b266     | AGACCTCGAGAACGCAACGGCACA                                     | S                   | pB193                        |
| #b267     | AGACCTCGAGCGCCCTGCGGATATG                                    | S                   | pB194                        |
| #b268     | AGACCTCGAGCAGGACCTGTTCGATGC                                  | S                   | pB195                        |
| #b273     | TATACTCGAGCGTATCGACGGTCATCGTC                                | S                   | pB198                        |
| #b274     | TATAGGTACCGCTTCCCCGCGCC                                      | A                   | pB198                        |
| #b311     | TCTTAGCTAGCGACCTTACGTTGGAAAAAGTCGAGCGCCG<br>CCTGGAA          | A                   | pB216                        |
| #b312     | TCTTAGCTAGCGACCTTACGTTGGAAAAAGTCGAGCGCCT<br>CCGCGAAGCTG      | A                   | pB217                        |
| #b313     | TCTTAGCTAGCGACCTTACGTTGGAAAAAGTCGAGCGCCT<br>CCTGGGCGCTGGGC   | A                   | pB218                        |
| #b314     | TCTTAGCTAGCGACCTTACGTTGGAAAAAGTCGAGCGCCT<br>CCTGGAAGCGGGCCGC | A                   | pB219                        |
| #b315     | TCTTAGCTAGCGACCTTACGTTGGAAAAAGTCGAGCGCCC<br>CCTGGAA          | A                   | pB220                        |
| #b316     | TCTTAGCTAGCGACCTTACGTTGGAAAAAGTCGAGCCCCT<br>CCTG             | A                   | pB221                        |

|       |                                                           |   |            |
|-------|-----------------------------------------------------------|---|------------|
| #b317 | TCTTAGCTAGCGACCTTACGTTGGAAAAAGTCGCCCGCCT<br>CC            | A | pB222      |
| #b318 | TCTTAGCTAGCGACCTTACGTTGGAAAAAGTCGAGCGGCT<br>CCTGG         | A | pB223      |
| #b327 | TATACTCGAGGTGAGCAAGGGCGAGG                                | S | pB233, 234 |
| #b328 | TATACTCGAGCTTGTACAGCTCGTCCATGC                            | A | pB233, 234 |
| #b349 | TATAGGTACCGACCTTACGTTGGAAAAAGTCGAGCG                      | A | pB255      |
| #b350 | TATAGGTACCAAAGTCGAGCGCCTCCTGGAAGC                         | A | pB256      |
| #b336 | TATAGGTACCCTCCTGGAAGCTGGGCC                               | A | pB240      |
| #b340 | TATACCATGGGCCGTATCGACGGTCATC                              | A | pB241      |
| #b334 | TTCGGTTAGAGCGGATCTTAGGTACCGACCTT                          | A | pB243, 244 |
| #b190 | TATACATATGAAAATCGAAGAAGGTAAACTG                           | S | pB137      |
| #b191 | TATAAAGCTTCAACCAGAGCTCCCGCTCGAGCCCGAATTA<br>GTCTGCGCGTCTT | A | pB137      |
| #b192 | TATAGAGCTCTGGTCGTATCGACGGTCATCGTCA                        | S | pB138      |
| #b193 | TATAAAGCTTCAGACCTTACGTTGGAAAAAGTC                         | A | Numerous   |
| #b196 | TATAGAGCTCTGGTTCCTTGCTGGTCGAGTGC                          | S | pB141      |
| #b197 | TATAGAGCTCTGGTAACGTGCCGCTGCGGC                            | S | Numerous   |
| #b212 | TATAGAGCTCTGGTCGTATCGACGGTCATCG                           | S | pB152      |
| #b213 | TATAAAGCTTCACCCACCCCCTGC                                  | A | pB152      |
| #b214 | TATAGAGCTCTGGTGCAGACGGTGTCCGGG                            | S | pB153      |
| #b215 | TATAAAGCTTCACGACCGCCCCAGG                                 | A | pB153      |
| #b216 | TATAGAGCTCTGGTGAGGCGCATGGCAG                              | S | pB154      |
| #b217 | TATAAAGCTTCAGGCCATATCCTCCCTGC                             | A | pB154      |
| #b218 | TATAGAGCTCTGGTGGCTCCCATATGGGTGA                           | S | pB155      |
| #b219 | TATAAAGCTTCAAAGCTCTTCCGATCCGC                             | A | pB155      |
| #b220 | TATAGAGCTCTGGTGTCCGAGAAGAGTCCGTTC                         | S | pB156      |
| #b221 | TATAAAGCTTCACCAGTCGGGATGGGC                               | A | pB156      |
| #b255 | ATATAAAGCTTCAGACCTTACGTTGGAAACAGTCGAG                     | A | pB182      |
| #b256 | ATATAAAGCTTCAGACCTTACGTTGGAAAAAGTCGCACG<br>C              | A | pB183      |
| #b257 | ATATAAAGCTTCAACAGACCTTACGTTGGAAAAAGTC                     | A | pB184      |

#### References for supporting information

1. De Soyza, A., Hall, A. J., Mahenthiralingam, E., Drevinek, P., Kaca, W., Drulis-Kawa, Z., Stoitsova, S. R., Toth, V., Coenye, T., Zlosnik, J. E. A., Burns, J. L., Sa-Correia, I., De Vos, D., Pirnay, J.-P., Kidd, T. J., Reid, D., Manos, J., Klockgether, J., Wiehlmann, L., Tummler, B., McClean, S., and Winstanley, C. (2013) Developing an international *Pseudomonas aeruginosa* reference panel. *Microbiologyopen*. **2**, 1010–1023
2. Peisker, K., Braun, D., Wolfle, T., Hentschel, J., Funfschilling, U., Fischer, G., Sickmann, A., and Rospert, S. (2008) Ribosome-associated complex binds to ribosomes in close proximity of Rpl31 at the exit of the polypeptide tunnel in yeast. *Mol Biol Cell*. **19**, 5279–5288
3. Belyy, A., Tabakova, I., Lang, A. E., Jank, T., Belyi, Y., and Aktories, K. (2015) Roles of Asp179 and Glu270 in ADP-Ribosylation of Actin by *Clostridium perfringens* Iota Toxin. *PLoS One*. **10**, e0145708
4. Raoux-Barbot, D., Belyy, A., Worpenberg, L., Montluc, S., Deville, C., Henriot, V., Ladant, D., and Mechold, U. Differential regulation of actin-activated nucleotidyl cyclase virulence factors by filamentous and globular actin. *Submitted*
5. Belyy, A., Raoux-Barbot, D., Saveanu, C., Namane, A., Ogryzko, V., Worpenberg, L., David, V., Henriot, V., Fellous, S., Merrifield, C., Assayag, E., Ladant, D., Renault, L., and Mechold, U. (2016) Actin activates *Pseudomonas aeruginosa* ExoY nucleotidyl cyclase toxin and ExoY-like effector domains from MARTX toxins. *Nat Commun*. **7**, 13582
6. Gmira, S., Karimova, G., and Ladant, D. (2001) Characterization of recombinant *Bordetella pertussis* adenylate cyclase toxins carrying passenger proteins. *Res Microbiol*. **152**, 889–900
